# Supplementary material for: Population Structure and Genetic Diversity of Shanlan Landrace Rice for GWAS of Cooking and Eating Quality Traits
Source: MDPI journal article supplement (doi:10.3390/ijms25063469), 2024-03-19
Supplement: s1 [file s1]

**Table S1.** The diverse collection of 90 rice accession.

| Code | Name           | Population structure | $W_x$ allele  |
|------|----------------|----------------------|---------------|
| SL01 | Menjiading3    | XI                   | $wx$          |
| SL02 | Baikezhan4     | XI                   | $W_x^a$       |
| SL03 | Shenshuilian   | XI                   | $W_x^{lv}$    |
| SL04 | menjiading2    | XI                   | $W_x^a$       |
| SL05 | hualinuo2      | GJ2                  | $W_x^{in}$    |
| SL06 | menjiaqin      | GJ2                  | $wx$          |
| SL07 | menjianing     | GJ2                  | $wx$          |
| SL08 | miaomumai2     | XI                   | $W_x^a$       |
| SL09 | zhishouwan1    | GJ2                  | $W_x^{in}$    |
| SL10 | zhishouwan2    | GJ2                  | $W_x^b$       |
| SL11 | menmiaonong1   | GJ2                  | $W_x^{la/mw}$ |
| SL12 | menmiaonong2   | GJ2                  | $W_x^{la/mw}$ |
| SL13 | mennuo1        | GJ2                  | $wx$          |
| SL14 | huanggu1       | GJ2                  | $wx$          |
| SL15 | huanggu2       | GJ2                  | $W_x^{la/mw}$ |
| SL16 | zhuangannuo    | GJ2                  | $wx$          |
| SL17 | shanlannuo1    | GJ2                  | $wx$          |
| SL18 | shanlannuo2    | GJ2                  | $W_x^{in}$    |
| SL19 | shanlannuo3    | GJ2                  | $wx$          |
| SL20 | hongkezidaoyan | XI                   | $W_x^{lv}$    |
| SL21 | guangtounuo    | GJ2                  | $wx$          |
| SL22 | shanlan2       | XI                   | $W_x^{la/mw}$ |
| SL23 | pole2          | XI                   | $W_x^{lv}$    |
| SL24 | menjiaoyan     | GJ2                  | $W_x^{in}$    |
| SL25 | menjiade2      | XI                   | $W_x^{lv}$    |
| SL26 | baisilianggan  | GJ2                  | $W_x^{la/mw}$ |
| SL27 | menjiaoyan1    | GJ2                  | $W_x^{la/mw}$ |
| SL28 | shanlannuo3    | GJ1                  | $W_x^{in}$    |
| SL29 | moyiqiu        | GJ2                  | $wx$          |
| SL30 | heisidi1       | GJ2                  | $W_x^b$       |
| SL31 | pozhan1        | XI                   | $W_x^{lv}$    |
| SL32 | pozhan3        | XI                   | $W_x^{lv}$    |
| SL33 | daohuangnuo    | XI                   | $W_x^{la/mw}$ |
| SL34 | heimaonuo      | GJ2                  | $wx$          |
| SL35 | zhongping1     | GJ2                  | $wx$          |
| SL36 | zhongping2     | GJ2                  | $wx$          |
| SL37 | zhongping3     | GJ2                  | $W_x^{in}$    |
| SL38 | zhongping4     | GJ2                  | $W_x^{in}$    |
| SL39 | zhongpingnian1 | XI                   | $W_x^a$       |
| SL40 | zhongpingnian2 | GJ2                  | $wx$          |

|      |                       |     |              |
|------|-----------------------|-----|--------------|
| SL41 | menkao2               | XI  | $Wx^{in}$    |
| SL42 | wuke3                 | XI  | $Wx^{lv}$    |
| SL43 | wuke4                 | XI  | $Wx^{lv}$    |
| SL44 | menjiafei1            | XI  | $Wx^a$       |
| SL45 | shanlan3              | XI  | $Wx^{lv}$    |
| SL46 | huangweishan2         | XI  | $Wx^{lv}$    |
| SL47 | menjiamei1            | XI  | $Wx^a$       |
| SL48 | menjiamei2            | XI  | $Wx^{lv}$    |
| SL49 | jialai1               | GJ2 | wx           |
| SL50 | kajialai2             | GJ2 | wx           |
| SL51 | gugu1                 | XI  | $Wx^{lv}$    |
| SL52 | gugu3                 | GJ2 | $Wx^b$       |
| SL53 | huangnuo3             | XI  | $Wx^a$       |
| SL54 | heidao1               | XI  | $Wx^a$       |
| SL55 | wanningnuo1           | XI  | $Wx^b$       |
| SL56 | shengsuanshanlan      | GJ2 | $Wx^{la/mw}$ |
| SL57 | menli                 | XI  | $Wx^{lv}$    |
| SL58 | shanlannuo3           | GJ2 | $Wx^{la/mw}$ |
| SL59 | lvdao                 | GJ1 | wx           |
| SL60 | shanlannuo3(hongmang) | XI  | $Wx^{in}$    |
| SL61 | menjiati1             | GJ2 | $Wx^{la/mw}$ |
| SL62 | menjiati4             | GJ1 | $Wx^{in}$    |
| SL63 | pohe                  | XI  | $Wx^{lv}$    |
| SL64 | shanlanzhumudao       | GJ2 | wx           |
| SL65 | lizhishanlan1         | XI  | $Wx^{lv}$    |
| SL66 | wuyuehong             | XI  | $Wx^{lv}$    |
| SL67 | fanjia                | GJ2 | wx           |
| SL68 | heimaozhan            | GJ2 | $Wx^{la/mw}$ |
| SL69 | shanlan1              | GJ2 | wx           |
| SL70 | shanlanuo2            | GJ2 | wx           |
| SL71 | heinuo                | XI  | wx           |
| SL72 | jinsi                 | XI  | $Wx^a$       |
| SL73 | zhaonong              | XI  | $Wx^a$       |
| SL74 | shanlannuo2           | XI  | $Wx^{lv}$    |
| SL75 | shanlannuo3           | XI  | $Wx^{lv}$    |
| SL76 | shanlannuo4           | GJ2 | $Wx^b$       |
| SL77 | guangtounuo           | XI  | $Wx^a$       |
| SL78 | baishanlan            | XI  | wx           |
| SL79 | shanlanbainuo         | XI  | $Wx^{lv}$    |
| SL80 | shuangkehongmi        | GJ2 | $Wx^{la/mw}$ |
| SL81 | shanlanhongmi         | XI  | $Wx^{lv}$    |
| SL82 | shanlanheimi          | XI  | $Wx^a$       |
| SL83 | shanlandao1           | XI  | wx           |

|      |             |     |             |
|------|-------------|-----|-------------|
| SL84 | shanlandao2 | GJ1 | $Wx^{a/mw}$ |
| Nip  | Nipponbare  | GJ1 | $Wx^b$      |
| ZH11 | Zhonghua11  | GJ1 | $Wx^b$      |
| GLA4 | Guangluai4  | XI  | $Wx^a$      |
| IR36 | IR36        | XI  | $Wx^a$      |
| 9311 | 9311        | XI  | $Wx^b$      |
| TN67 | Tainung67   | GJ1 | $Wx^b$      |

**Table S2.** Phenotypic variation in different among *Wx* alleles.

|                      | <i>wx</i>  |             | <i>Wx<sup>a</sup></i> |             | <i>Wx<sup>b</sup></i> |              | <i>Wx<sup>ab</sup></i> |             | <i>Wx<sup>ab/mw</sup></i> |              | <i>Wx<sup>c</sup></i> |             |
|----------------------|------------|-------------|-----------------------|-------------|-----------------------|--------------|------------------------|-------------|---------------------------|--------------|-----------------------|-------------|
|                      | Means ± SD | Range       | Means ± SD            | Range       | Means ± SD            | Range        | Means ± SD             | Range       | Means ± SD                | Range        | Means ± SD            | Range       |
| AAC (%)              | 2.31±0.6   | 1.6-3.2     | 26.6±2                | 23.6-28.7   | 16.1±2                | 14.8-17.8    | 19.9±4                 | 17.6-24.6   | 15.4±5                    | 11.0-26.4    | 26.7±6                | 20.9-31.7   |
| PV (RVU)             | 182.5±52.3 | 76.2-250.3  | 290.8±26.1            | 229.3-344.7 | 294.7±18.5            | 274.4-321.1  | 223.5±25.7             | 171.0-266.5 | 295.0±30.2                | 239.7-329.2  | 203.7±29.4            | 174.8-234.5 |
| HPV (RVU)            | 104.9±30.4 | 38.4-140.8  | 209.4±23.7            | 165.5-265.4 | 163.8±13.9            | 170.6-178.0  | 161.1±16.0             | 124.4-186.6 | 166.2±22.3                | 108.9-197.0  | 136.5±17.9            | 105.7-173.0 |
| BD (RVU)             | 77.6±27.4  | 35.7-117.7  | 81.4±17.6             | 48.1-105.9  | 130.8±13.5            | 110.9-150.5  | 62.4±22.5              | 31.3-108.8  | 128.8±28.9                | 103.1-173.8  | 67.2±20.2             | 20.3-106.7  |
| CPV (RVU)            | 135.7±40.2 | 52.3-206.3  | 373.6±35.5            | 323.3-474.2 | 269.4±18.8            | 236.9-291.5  | 282.6±29.1             | 269.8-293.8 | 268.5±50.4                | 232.0-300.4  | 270.8±35.6            | 265.3-333.8 |
| SB (RVU)             | -46.8±24.7 | -83.3- -6.8 | 82.8±16.1             | 66.3-129.5  | -25.2±11.1            | -37.5- -21.7 | 59.1±18.6              | 37.8-89.1   | -26.5±48.3                | -85.1- -23.5 | 70.0±25.4             | 34.6-103.5  |
| PT (°C)              | 67.2±1.8   | 63.9-71.2   | 77.2±2.8              | 70.0-79.9   | 72.3±3.0              | 68.1-77.2    | 73.8±3.8               | 67.7-78.3   | 71.9±3.8                  | 67.2-79.9    | 76.8±2.1              | 70.4-79.1   |
| HD (gf)              | 2.7±1.3    | 1.3-5.6     | 18.4±6.4              | 4.4-31.4    | 4.5±0.8               | 3.3-5.5      | 6.1±2.1                | 2.5-10.4    | 4.6±2.4                   | 2.1-10.8     | 19.9±2.8              | 14.0-24.0   |
| ADH (gf s)           | -2.2±2.2   | -9.5- -0.1  | -4.6±3.2              | -11.9-1.4   | -11.1±10.8            | -30- -0.5    | -4.5±7.0               | -22-7.4     | -5.3±6.8                  | -25-2.0      | -17.2±23.1            | -15.3- -4.1 |
| GUM (gf)             | 2.2±2      | 0.4-8.1     | 11.1±5.1              | 2.0-17.7    | 2.5±0.7               | 1.6-3.8      | 3.3±1.5                | 1.3-7.2     | 2.6±1.3                   | 1.4-6.2      | 11.3±2.7              | 6.7-17.8    |
| COH (gf)             | 0.8±0.4    | 0.2-1.5     | 0.6±0.1               | 0.4-0.8     | 0.6±0.1               | 0.5-0.8      | 1.0±1.3                | 0.5-5.0     | 0.6±0.1                   | 0.5-0.7      | 0.6±0.1               | 0.4-0.9     |
| To (°C)              | 61.2±1.7   | 58.2-65.7   | 72.3±0.8              | 70.8-73.3   | 64.1±4.0              | 60.4-71.4    | 65.7±5.2               | 57.0-71.3   | 64.7±5.7                  | 59.2-76.4    | 70.6±2.6              | 68.5-73.6   |
| Tp (°C)              | 69.2±1.6   | 66.7-74.2   | 75.1±3.2              | 67.2-78.4   | 71.7±4.0              | 68.5-79.4    | 73.0±4.0               | 66.0-76.6   | 71.4±4.4                  | 67.7-80.7    | 75.4±2.3              | 73.5-77.8   |
| Tc (°C)              | 78.8±2.5   | 76.0-85.0   | 81.3±1.1              | 79.9-84.1   | 81.6±4.0              | 76.2-86.1    | 80.9±2.1               | 79.1-82.6   | 80.1±2.3                  | 77.8-83.2    | 80.7±1.8              | 77.9-82.9   |
| ΔHg (J/g)            | 10.1±0.6   | 8.8-11.0    | 8.7±0.7               | 7.8-10.1    | 8.5±0.3               | 7.8-8.7      | 8.4±1.1                | 6.5-9.9     | 8.9±0.8                   | 7.8-9.6      | 8.1±0.9               | 5.9-9.8     |
| RT <sub>0</sub> (°C) | 48±2.2     | 43.7-51.8   | 47.6±0.4              | 47.0-48.4   | 48.2±2.0              | 46.2-47.7    | 47.8±1.0               | 46.3-49.2   | 48.1±1.3                  | 46.6-48.9    | 47.8±1.4              | 45.4-51.4   |
| RT <sub>p</sub> (°C) | 58±1.4     | 55.3-60.9   | 58.2±0.4              | 57.2-59.0   | 57.1±1.6              | 57.1-58.8    | 58.1±0.7               | 56.9-59.0   | 57.8±0.5                  | 56.8-58.9    | 58.3±1.1              | 56.1-59.5   |
| RT <sub>c</sub> (°C) | 65.4±2     | 62.2-69.6   | 66.9±0.8              | 66.2-68.3   | 65.5±0.7              | 64.6-66.5    | 65.8±1.9               | 64.5-66.7   | 65.2±2.0                  | 64.6-67.8    | 67.0±1.5              | 63.5-72.2   |
| ΔHr (J/g)            | 1.1±0.8    | 0.3-3.0     | 5.7±0.6               | 5.0-6.3     | 2.6±1.0               | 1.4-4.1      | 4.2±1.5                | 1.7-6.1     | 3.2±2.2                   | 0.6-7.3      | 5.3±0.9               | 4.0-6.8     |
| R (%)                | 11.5±8.5   | 3.5-36      | 59.2±14               | 33.4-79.3   | 37.5±13.7             | 19.3-53.8    | 46.3±15.5              | 18.1-71.0   | 35.6±22.9                 | 6.7-76.8     | 66.8±9.5              | 45.9-81.9   |

**Table S3.** The SNP information in the 19.71–19.81 Mb candidate region for GUM.

| MSU ID                                      | Chromosome | SNP location | Reference | Alternative | Variation type | Associated signal in GWAS ( <i>p</i> value)* |
|---------------------------------------------|------------|--------------|-----------|-------------|----------------|----------------------------------------------|
| LOC_Os02g33250,<br>LOC_Os02g33260(dist=501) | Chr2       | 19767079     | A         | G           | upstream       | 7.44E-06                                     |
| LOC_Os02g33250,<br>LOC_Os02g33260(dist=499) | Chr2       | 19767081     | T         | G           | upstream       | 6.69E-04                                     |

\*The *p*-value was calculated by Tassel5 with MLM. SNPs with *p*-value less than 0.001 were listed.

**Table S4.** The SNP information in the 17.68–17.78 Mb candidate region for GUM.

| MSU ID                    | Chromosome | SNP location | Reference | Alternative | Variation type | Associated signal in GWAS ( <i>p</i> value)* |
|---------------------------|------------|--------------|-----------|-------------|----------------|----------------------------------------------|
| LOC_Os05g30620(dist=1108) | Chr5       | 17739626     | A         | G           | downstream     | 3.54E-05                                     |
| LOC_Os05g30560(dist=950)  | Chr5       | 17708858     | T         | C           | upstream       | 5.01E-04                                     |

\*The *p*-value was calculated by Tassel5 with MLM. SNPs with *p*-value less than 0.001 were listed.

**Table S5.** The SNP information in the 16.55–16.65 Mb candidate region for To.

| MSU ID                                                   | Chromosome | SNP<br>location | Reference | Alternative | Variation<br>type | Associated signal in<br>GWAS ( <i>p</i> value)* |
|----------------------------------------------------------|------------|-----------------|-----------|-------------|-------------------|-------------------------------------------------|
| LOC_Os12g28110(dist=3051),<br>LOC_Os12g28137(dist=14770) | Chr12      | 16601969        | G         | T           | intergenic        | 2.46E-04                                        |
| LOC_Os12g28110(dist=3063),<br>LOC_Os12g28137(dist=14758) | Chr12      | 16601981        | G         | A           | intergenic        | 2.46E-04                                        |

\*The *p*-value was calculated by Tassel5 with MLM. SNPs with *p*-value less than 0.001 were listed.

**Table S6.** The SNP information in the 20.94–21.04 Mb candidate region for Tp.

| MSU ID                                              | Chromosome | SNP location | Reference | Alternative | Variation type               | Associated signal in GWAS <i>p</i> value)* |
|-----------------------------------------------------|------------|--------------|-----------|-------------|------------------------------|--------------------------------------------|
| LOC_Os08g33610(dist=7172),LOC_Os08g33620(dist=4474) | Chr8       | 20992803     | T         | C           | intergenic                   | 2.28E-06                                   |
| LOC_Os08g33620(dist=1733)                           | Chr8       | 20995544     | G         | A           | upstream                     | 2.28E-06                                   |
| LOC_Os08g33610(dist=9491),LOC_Os08g33620(dist=2155) | Chr8       | 20995122     | A         | G           | intergenic                   | 5.60E-06                                   |
| LOC_Os08g33610(dist=9507),LOC_Os08g33620(dist=2139) | Chr8       | 20995138     | T         | C           | intergenic                   | 5.60E-06                                   |
| LOC_Os08g33620(dist=1288)                           | Chr8       | 20995989     | A         | C           | upstream                     | 2.80E-05                                   |
| LOC_Os08g33620(dist=1278)                           | Chr8       | 20995999     | T         | C           | upstream                     | 2.80E-05                                   |
| LOC_Os08g33590(dist=1692)                           | Chr8       | 20972567     | A         | G           | downstream                   | 3.07E-05                                   |
| LOC_Os08g33690                                      | Chr8       | 21037004     | A         | G           | exonic,<br>synonymous<br>SNV | 3.13E-05                                   |
| LOC_Os08g33590(LOC_Os08g33590.1:c.-188G>C)          | Chr8       | 20977227     | C         | G           | UTR5                         | 3.34E-05                                   |
| LOC_Os08g33700                                      | Chr8       | 21043296     | T         | C           | exonic,<br>synonymous<br>SNV | 3.34E-05                                   |
| LOC_Os08g33660(dist=525)                            | Chr8       | 21021988     | A         | G           | upstream                     | 4.78E-05                                   |
| LOC_Os08g33620(dist=1811)                           | Chr8       | 20995466     | A         | G           | upstream                     | 5.18E-05                                   |
| LOC_Os08g33620,LOC_Os08g33630(dist=1662)            | Chr8       | 20998398     | A         | G           | downstream                   | 5.29E-05                                   |
| LOC_Os08g33590(dist=246)                            | Chr8       | 20977500     | C         | G           | upstream                     | 5.35E-05                                   |
| LOC_Os08g33610(dist=886)                            | Chr8       | 20986517     | A         | T           | upstream                     | 5.35E-05                                   |
| LOC_Os08g33610(dist=898)                            | Chr8       | 20986529     | C         | T           | upstream                     | 5.35E-05                                   |
| LOC_Os08g33610(dist=4207),LOC_Os08g33620(dist=7439) | Chr8       | 20989838     | T         | C           | intergenic                   | 5.37E-05                                   |
| LOC_Os08g33630(dist=662)                            | Chr8       | 21004608     | A         | G           | upstream                     | 5.37E-05                                   |
| LOC_Os08g33630(dist=667)                            | Chr8       | 21004613     | C         | A           | upstream                     | 5.37E-05                                   |
| LOC_Os08g33640(dist=952)                            | Chr8       | 21009762     | A         | C           | upstream                     | 5.37E-05                                   |
| LOC_Os08g33640(dist=743)                            | Chr8       | 21009971     | G         | A           | upstream                     | 5.37E-05                                   |
| LOC_Os08g33680(LOC_Os08g33680.1:c.-13C>G)           | Chr8       | 21036007     | G         | C           | UTR5                         | 5.37E-05                                   |
| LOC_Os08g33610                                      | Chr8       | 20985222     | T         | A           | intronic                     | 5.41E-05                                   |
| LOC_Os08g33610                                      | Chr8       | 20985159     | T         | C           | intronic                     | 5.43E-05                                   |
| LOC_Os08g33610                                      | Chr8       | 20985191     | C         | T           | intronic                     | 5.43E-05                                   |
| LOC_Os08g33670(dist=476)                            | Chr8       | 21029435     | A         | G           | upstream                     | 5.69E-05                                   |
| LOC_Os08g33670(dist=477)                            | Chr8       | 21029436     | G         | A           | upstream                     | 5.69E-05                                   |
| LOC_Os08g33670(dist=543)                            | Chr8       | 21029502     | T         | C           | upstream                     | 5.69E-05                                   |
| LOC_Os08g33650                                      | Chr8       | 21017560     | T         | G           | intronic                     | 5.70E-05                                   |
| LOC_Os08g33690(dist=2167),LOC_Os08g33700(dist=3559) | Chr8       | 21039444     | A         | C           | intergenic                   | 5.74E-05                                   |
| LOC_Os08g33690(dist=2480),LOC_Os08g33700(dist=3246) | Chr8       | 21039757     | T         | C           | intergenic                   | 5.74E-05                                   |
| LOC_Os08g33690(dist=2519),LOC_Os08g33700(dist=3207) | Chr8       | 21039796     | C         | T           | intergenic                   | 5.74E-05                                   |
| LOC_Os08g33590(dist=1511)                           | Chr8       | 20978765     | A         | C           | upstream                     | 5.77E-05                                   |



|                                                     |      |          |   |   |               |          |
|-----------------------------------------------------|------|----------|---|---|---------------|----------|
|                                                     |      |          |   |   | exonic,       |          |
| LOC_Os08g33690                                      | Chr8 | 21036767 | A | G | synonymous    | 5.77E-05 |
|                                                     |      |          |   |   | SNV           |          |
| LOC_Os08g33670(dist=2240),LOC_Os08g33680(dist=2979) | Chr8 | 21031199 | A | G | intergenic    | 5.79E-05 |
| LOC_Os08g33610(dist=5933),LOC_Os08g33620(dist=5713) | Chr8 | 20991564 | T | C | intergenic    | 5.81E-05 |
| LOC_Os08g33610(dist=6070),LOC_Os08g33620(dist=5576) | Chr8 | 20991701 | G | T | intergenic    | 5.81E-05 |
| LOC_Os08g33650(LOC_Os08g33650.1:c.*117A>G)          | Chr8 | 21015720 | A | G | UTR3          | 5.81E-05 |
| LOC_Os08g33630(dist=449)                            | Chr8 | 21004395 | T | C | upstream      | 5.84E-05 |
| LOC_Os08g33630(dist=458)                            | Chr8 | 21004404 | G | A | upstream      | 5.84E-05 |
| LOC_Os08g33700(dist=1499)                           | Chr8 | 21041504 | G | A | upstream      | 5.90E-05 |
|                                                     |      |          |   |   | exonic,       |          |
| LOC_Os08g33600                                      | Chr8 | 20983484 | A | G | synonymous    | 5.93E-05 |
|                                                     |      |          |   |   | SNV           |          |
| LOC_Os08g33690(dist=1001)                           | Chr8 | 21038278 | T | G | downstream    | 5.93E-05 |
|                                                     |      |          |   |   | exonic,       |          |
| LOC_Os08g33600 (retrotransposon protein)            | Chr8 | 20983863 | A | G | nonsynonymous | 5.95E-05 |
|                                                     |      |          |   |   | SNV           |          |
|                                                     |      |          |   |   | exonic,       |          |
| LOC_Os08g33600 (retrotransposon protein)            | Chr8 | 20984209 | G | A | nonsynonymous | 5.95E-05 |
|                                                     |      |          |   |   | SNV           |          |
| LOC_Os08g33630(dist=316)                            | Chr8 | 21004262 | T | C | upstream      | 5.95E-05 |
| LOC_Os08g33630(dist=332)                            | Chr8 | 21004278 | C | T | upstream      | 5.95E-05 |
| LOC_Os08g33630(dist=335)                            | Chr8 | 21004281 | G | T | upstream      | 5.95E-05 |
| LOC_Os08g33630(dist=351)                            | Chr8 | 21004297 | T | G | upstream      | 5.95E-05 |
| LOC_Os08g33630(dist=388)                            | Chr8 | 21004334 | G | A | upstream      | 5.95E-05 |
| LOC_Os08g33670(dist=1797)                           | Chr8 | 21023747 | T | A | downstream    | 5.95E-05 |
| LOC_Os08g33670                                      | Chr8 | 21028183 | A | C | intronic      | 5.95E-05 |
| LOC_Os08g33670(dist=801)                            | Chr8 | 21029760 | T | C | upstream      | 5.95E-05 |
| LOC_Os08g33590(dist=1601)                           | Chr8 | 20978855 | A | G | upstream      | 5.98E-05 |
| LOC_Os08g33680(dist=688)                            | Chr8 | 21033490 | A | C | downstream    | 5.98E-05 |
| LOC_Os08g33630(dist=3999),LOC_Os08g33640(dist=2769) | Chr8 | 21007945 | G | A | intergenic    | 5.98E-05 |
| LOC_Os08g33630(dist=4010),LOC_Os08g33640(dist=2758) | Chr8 | 21007956 | A | G | intergenic    | 5.98E-05 |
| LOC_Os08g33680(dist=1370)                           | Chr8 | 21032808 | G | A | downstream    | 5.98E-05 |
| LOC_Os08g33680(dist=1366)                           | Chr8 | 21032812 | C | G | downstream    | 5.98E-05 |
| LOC_Os08g33680(dist=1350)                           | Chr8 | 21032828 | A | G | downstream    | 5.98E-05 |
|                                                     |      |          |   |   | exonic,       |          |
| LOC_Os08g33680                                      | Chr8 | 21034712 | T | C | synonymous    | 5.98E-05 |
|                                                     |      |          |   |   | SNV           |          |
| LOC_Os08g33700(dist=1312)                           | Chr8 | 21041691 | G | C | upstream      | 5.98E-05 |
| LOC_Os08g33620,LOC_Os08g33630(dist=1648)            | Chr8 | 20998412 | T | C | downstream    | 5.98E-05 |
| LOC_Os08g33620,LOC_Os08g33630(dist=1631)            | Chr8 | 20998429 | A | G | downstream    | 5.98E-05 |
| LOC_Os08g33680(dist=1944)                           | Chr8 | 21032234 | A | G | downstream    | 5.98E-05 |

|                                                     |      |          |   |   |               |          |
|-----------------------------------------------------|------|----------|---|---|---------------|----------|
| LOC_Os08g33680                                      | Chr8 | 21035183 | G | A | intronic      | 5.98E-05 |
|                                                     |      |          |   |   | exonic,       |          |
| LOC_Os08g33670                                      | Chr8 | 21027338 | C | G | synonymous    | 5.98E-05 |
|                                                     |      |          |   |   | SNV           |          |
| LOC_Os08g33540                                      | Chr8 | 20945875 | T | A | intronic      | 5.98E-05 |
| LOC_Os08g33540                                      | Chr8 | 20945910 | C | A | intronic      | 5.98E-05 |
| LOC_Os08g33540                                      | Chr8 | 20946268 | C | T | intronic      | 5.98E-05 |
| LOC_Os08g33540                                      | Chr8 | 20946353 | T | G | intronic      | 5.98E-05 |
| LOC_Os08g33540,LOC_Os08g33550(dist=889)             | Chr8 | 20948070 | A | G | upstream      | 5.98E-05 |
| LOC_Os08g33580(dist=3739),LOC_Os08g33590(dist=3158) | Chr8 | 20971101 | T | C | intergenic    | 5.98E-05 |
| LOC_Os08g33590(dist=1616)                           | Chr8 | 20972643 | A | G | downstream    | 5.98E-05 |
| LOC_Os08g33590                                      | Chr8 | 20976317 | G | A | intronic      | 5.98E-05 |
| LOC_Os08g33590(dist=361)                            | Chr8 | 20977615 | T | C | upstream      | 5.98E-05 |
| LOC_Os08g33590(dist=539)                            | Chr8 | 20977793 | A | T | upstream      | 5.98E-05 |
| LOC_Os08g33590(dist=581)                            | Chr8 | 20977835 | G | A | upstream      | 5.98E-05 |
| LOC_Os08g33590(dist=1127)                           | Chr8 | 20978381 | T | A | upstream      | 5.98E-05 |
| LOC_Os08g33590(dist=1310)                           | Chr8 | 20978564 | A | G | upstream      | 5.98E-05 |
| LOC_Os08g33590(dist=1366)                           | Chr8 | 20978620 | C | T | upstream      | 5.98E-05 |
| LOC_Os08g33590(dist=1989)                           | Chr8 | 20979243 | T | A | upstream      | 5.98E-05 |
| LOC_Os08g33590(dist=2215),LOC_Os08g33600(dist=3227) | Chr8 | 20979469 | G | A | intergenic    | 5.98E-05 |
| LOC_Os08g33590(dist=2261),LOC_Os08g33600(dist=3181) | Chr8 | 20979515 | C | A | intergenic    | 5.98E-05 |
| LOC_Os08g33590(dist=2265),LOC_Os08g33600(dist=3177) | Chr8 | 20979519 | A | T | intergenic    | 5.98E-05 |
| LOC_Os08g33590(dist=2418),LOC_Os08g33600(dist=3024) | Chr8 | 20979672 | G | A | intergenic    | 5.98E-05 |
| LOC_Os08g33590(dist=2422),LOC_Os08g33600(dist=3020) | Chr8 | 20979676 | G | A | intergenic    | 5.98E-05 |
| LOC_Os08g33590(dist=2433),LOC_Os08g33600(dist=3009) | Chr8 | 20979687 | G | A | intergenic    | 5.98E-05 |
| LOC_Os08g33590(dist=2754),LOC_Os08g33600(dist=2688) | Chr8 | 20980008 | C | T | intergenic    | 5.98E-05 |
| LOC_Os08g33590(dist=2770),LOC_Os08g33600(dist=2672) | Chr8 | 20980024 | T | A | intergenic    | 5.98E-05 |
| LOC_Os08g33590(dist=3326),LOC_Os08g33600(dist=2116) | Chr8 | 20980580 | T | G | intergenic    | 5.98E-05 |
| LOC_Os08g33600(dist=1937)                           | Chr8 | 20980759 | A | T | upstream      | 5.98E-05 |
| LOC_Os08g33600(dist=1604)                           | Chr8 | 20981092 | A | T | upstream      | 5.98E-05 |
| LOC_Os08g33600(dist=1525)                           | Chr8 | 20981171 | T | C | upstream      | 5.98E-05 |
| LOC_Os08g33600(dist=1022)                           | Chr8 | 20981674 | G | A | upstream      | 5.98E-05 |
| LOC_Os08g33600(dist=328)                            | Chr8 | 20982368 | T | G | upstream      | 5.98E-05 |
| LOC_Os08g33600(dist=125)                            | Chr8 | 20982571 | T | C | upstream      | 5.98E-05 |
|                                                     |      |          |   |   | exonic,       |          |
| LOC_Os08g33600                                      | Chr8 | 20982782 | A | G | synonymous    | 5.98E-05 |
|                                                     |      |          |   |   | SNV           |          |
| LOC_Os08g33600 (retrotransposon protein)            | Chr8 | 20982813 | A | G | exonic,       |          |
|                                                     |      |          |   |   | nonsynonymous | 5.98E-05 |
|                                                     |      |          |   |   | SNV           |          |

|                                          |      |          |   |   |                                 |          |
|------------------------------------------|------|----------|---|---|---------------------------------|----------|
| LOC_Os08g33600 (retrotransposon protein) | Chr8 | 20982841 | G | A | exonic,<br>nonsynonymous<br>SNV | 5.98E-05 |
| LOC_Os08g33600                           | Chr8 | 20982944 | G | A | exonic,<br>synonymous<br>SNV    | 5.98E-05 |
| LOC_Os08g33600 (retrotransposon protein) | Chr8 | 20983039 | T | C | exonic,<br>nonsynonymous<br>SNV | 5.98E-05 |
| LOC_Os08g33600                           | Chr8 | 20983069 | C | T | intronic                        | 5.98E-05 |
| LOC_Os08g33600                           | Chr8 | 20983080 | C | T | intronic                        | 5.98E-05 |
| LOC_Os08g33600                           | Chr8 | 20983694 | T | G | exonic,<br>synonymous<br>SNV    | 5.98E-05 |
| LOC_Os08g33600,LOC_Os08g33610(dist=219)  | Chr8 | 20984356 | A | G | downstream                      | 5.98E-05 |
| LOC_Os08g33600,LOC_Os08g33610(dist=208)  | Chr8 | 20984367 | C | A | downstream                      | 5.98E-05 |
| LOC_Os08g33600,LOC_Os08g33610(dist=51)   | Chr8 | 20984524 | G | A | downstream                      | 5.98E-05 |
| LOC_Os08g33610 (retrotransposon protein) | Chr8 | 20984627 | C | T | exonic,<br>nonsynonymous<br>SNV | 5.98E-05 |
| LOC_Os08g33610                           | Chr8 | 20984686 | A | G | exonic,<br>synonymous<br>SNV    | 5.98E-05 |
| LOC_Os08g33610                           | Chr8 | 20984938 | G | A | exonic,<br>synonymous<br>SNV    | 5.98E-05 |
| LOC_Os08g33610                           | Chr8 | 20984989 | G | A | exonic,<br>synonymous<br>SNV    | 5.98E-05 |
| LOC_Os08g33610 (retrotransposon protein) | Chr8 | 20985502 | G | A | exonic,<br>nonsynonymous<br>SNV | 5.98E-05 |

\*The  $p$ -value was calculated by Tassel5 with MLM. SNPs with  $p$ -value less than 0.00006 were listed. The significant nonsynonymous SNPs or SNPs located on UTR were highlighted in yellow background.

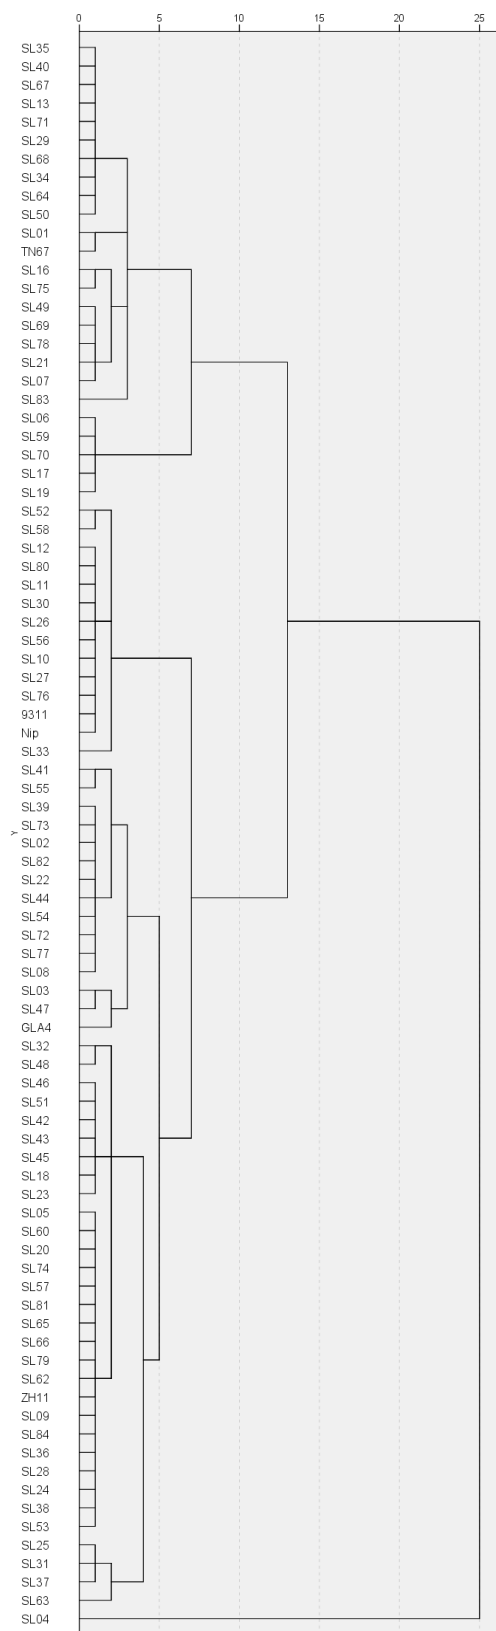

**Figure S1.** Cluster diagram of quality traits of different rice varieties.

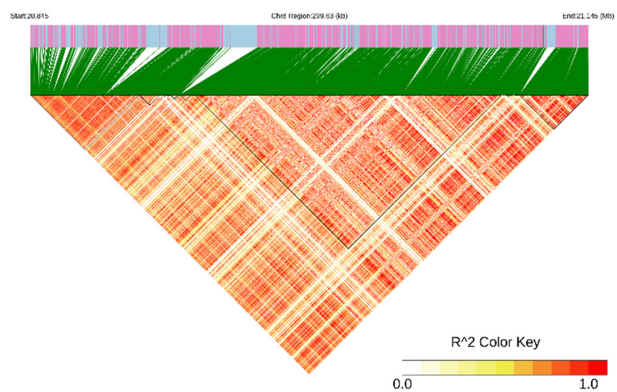

**Figure S2.** Identification of LD block in chromosome 8 for peak gelatinization temperature ( $T_p$ ).
